# Supplementary material
Source: MDPI journal article supplement (https://www.mdpi.com/2073-4395/14/5/899)
Supplement: s1 [file s1]

**Table S1.** Principal Component Results

| Ingredient | Initial eigenvalue |            |              | Extract the sum of the squares of the loads |            |              |
|------------|--------------------|------------|--------------|---------------------------------------------|------------|--------------|
|            | total              | Variance % | Cumulative % | total                                       | Variance % | Cumulative % |
| 1          | 8.79               | 79.911     | 79.911       | 8.79                                        | 79.911     | 79.911       |
| 2          | 1.484              | 13.488     | 93.399       | 1.484                                       | 13.488     | 93.399       |
| 3          | 0.587              | 5.332      | 98.731       |                                             |            |              |
| 4          | 0.072              | 0.652      | 99.383       |                                             |            |              |

**Table S2.** Principal component scores and composite scores

| Ground level | process           | Y1 Score | Y2 Score | aggregate score | rankings |
|--------------|-------------------|----------|----------|-----------------|----------|
| 0-10         | CN <sub>0</sub>   | -2.367   | -0.264   | -1.927          | 6        |
|              | CN <sub>100</sub> | -1.401   | -0.231   | -1.151          | 5        |
|              | BN <sub>0</sub>   | 1.261    | 1.740    | 1.243           | 4        |
|              | BN <sub>100</sub> | 3.327    | 2.040    | 2.934           | 1        |
|              | SN <sub>0</sub>   | 2.445    | -0.962   | 1.824           | 3        |
|              | SN <sub>100</sub> | 3.681    | -0.896   | 2.821           | 2        |
| 10-30        | CN <sub>0</sub>   | -4.570   | -0.371   | -3.702          | 6        |
|              | CN <sub>100</sub> | -3.770   | -0.034   | -3.017          | 5        |
|              | BN <sub>0</sub>   | -1.821   | 1.211    | -1.291          | 4        |
|              | BN <sub>100</sub> | -0.256   | 1.470    | -0.006          | 2        |
|              | SN <sub>0</sub>   | -1.042   | -1.183   | -0.992          | 3        |
|              | SN <sub>100</sub> | 0.267    | -1.319   | 0.036           | 1        |
